# Supplementary material
Source: publisher site journal article supplement (https://www.kjim.org/upload/media/kjim-2022-283_suppl1.pdf)
Supplement: Supplementary file 1 [file kjim-2022-283_suppl1.pdf]

**Supplementary Table 1. Baseline characteristics in the Korea National Health and Nutrition Examination Survey**

| Variable                   | Total<br>(n = 24,822, weighted n = 35,151,173) |      |              |      | Adults aged 20–34 years<br>(n = 4,918, weighted n = 9,480,045) |      |              |      |
|----------------------------|------------------------------------------------|------|--------------|------|----------------------------------------------------------------|------|--------------|------|
|                            | No.                                            | %    | Weighted no. | %    | No.                                                            | %    | Weighted no. | %    |
| Age, yr, mean ± SE         | 46.2 ± 0.2                                     |      |              |      | 27.0 ± 0.1                                                     |      |              |      |
| Age group, yr              |                                                |      |              |      |                                                                |      |              |      |
| 20–34                      | 4,918                                          | 19.8 | 9,480,045    | 27.0 | NA                                                             |      | NA           |      |
| 35–64                      | 14,489                                         | 58.4 | 20,798,607   | 59.2 | NA                                                             |      | NA           |      |
| ≥ 65                       | 5,415                                          | 21.8 | 4,872,521    | 13.9 | NA                                                             |      | NA           |      |
| Men                        | 10,889                                         | 43.9 | 17,559,563   | 50.0 | 2,375                                                          | 48.3 | 5,112,327    | 53.9 |
| Overweight or obesity      | 14,149                                         | 57.0 | 20,144,905   | 57.3 | 2,309                                                          | 46.9 | 4,616,627    | 48.7 |
| Overweight                 | 5,676                                          | 22.9 | 7,933,443    | 22.6 | 838                                                            | 17.0 | 1,637,371    | 17.3 |
| Obesity                    | 8,473                                          | 34.1 | 12,211,462   | 34.7 | 1,471                                                          | 29.9 | 2,979,256    | 31.4 |
| Class I                    | 7,181                                          | 28.9 | 10,245,899   | 29.1 | 1,101                                                          | 22.4 | 2,228,349    | 23.5 |
| Class II                   | 1,103                                          | 4.4  | 1,639,666    | 4.7  | 284                                                            | 5.8  | 561,020      | 5.9  |
| Class III                  | 189                                            | 0.8  | 325,897      | 0.9  | 86                                                             | 1.7  | 189,887      | 2.0  |
| Abdominal obesity          | 7,594                                          | 30.6 | 10,357,504   | 29.5 | 1,006                                                          | 20.5 | 2,017,653    | 21.3 |
| Family history of diabetes | 5,390                                          | 21.7 | 7,808,629    | 22.2 | 893                                                            | 18.2 | 1,672,000    | 17.6 |
| Hypertension               | 7,168                                          | 28.9 | 8,737,222    | 24.9 | 280                                                            | 5.7  | 591,670      | 6.2  |
| Dyslipidemia               | 5,894                                          | 23.7 | 8,460,210    | 24.1 | 800                                                            | 16.3 | 1,615,133    | 17.0 |

SE, standard error; NA, not applicable.
